# Supplementary material
Source: Research Square preprint supplement (doi:10.21203/rs.3.rs-9640501/v1)
Supplement: Supplementary file 1 [file 426cb7c723902d9450549b4b.pdf]

# Supplementary Materials: Phase diagram of palladium characterized *in situ via* synchrotron X-ray diffraction coupled with laser-heated diamond anvil cell

Simone Anzellini<sup>1\*</sup>, Samuel R. Baty<sup>2</sup>, Leonid Burakovsky<sup>2</sup>,  
Jose Luis Rodrigo-Ramon<sup>1</sup>, Jorge Rodríguez-Lescure González<sup>1</sup>,  
Pablo Botella<sup>1</sup>, Egor Koemets<sup>3</sup>, Daniel Errandonea<sup>1</sup>

<sup>1</sup>Department of Applied Physics - Institute of Materials Science, Matter at High Pressure (MALTA) Consolider Team, University of Valencia, C/Dr. Moliner 50, Burjassot, 46100, Valencia, Spain.

<sup>2</sup>Theoretical Divisions, Los Alamos National Laboratory, Los Alamos, 87545 NM, United States of America.

<sup>3</sup>Diamond Light Source Ltd., Harwell Science and Innovation Campus, Diamond House, Didcot, OX11 0DE, Oxfordshire, UK.

\*Corresponding author(s). E-mail(s): [simone2.anzellini@uv.es](mailto:simone2.anzellini@uv.es);

## Abstract

Transition metals exhibit complex structural behavior under extreme conditions, yet their high-pressure–high-temperature phase diagrams remain poorly constrained experimentally. Palladium exemplifies this problem, with a predicted face-centered cubic (*fcc*) to body-centered cubic (*bcc*) transition that has eluded experimental detection. Here we demonstrate that this discrepancy arises from kinetic constraints and can be overcome through melt-mediated pathways. Using *in situ* synchrotron X-ray diffraction in a laser-heated diamond anvil cell, we map the phase diagram of palladium up to 107 GPa and 6800 K and directly access a *bcc* polymorph *via* rapid quenching from the liquid. We show that, although thermodynamically competitive, the *bcc* phase is kinetically inaccessible along the solid-state pathway, but becomes stabilized near melting where enhanced atomic mobility enables structural selection. This establishes a general mechanism by which high-pressure phases can remain hidden in experiments despite theoretical stability. Our results reconcile long-standing theory–experiment inconsistencies



the observed splitting of the Pd diffraction peaks in one of the experimental loadings. The depicted Pawley refinement demonstrates an excellent fit to the data, yielding lattice parameters of  $a = 3.890 \text{ \AA}$  for pure Pd and  $a = 3.980 \text{ \AA}$  for an expanded  $fcc$  phase. This figure also provides a comparison between the current dataset and the results reported by Fedotenko *et al.* [2] regarding the characterization of PdC in LH-DAC experiments. The strong agreement between our observations and the reported values for PdC suggests that palladium carbide formed during the sample preparation stage. Notably, these peaks were present from the initial pressure increase, despite no laser heating having been applied to this specific sample. A critical difference in the preparation of this loading was the pre-heating of the Pd powder in an oven at  $250^\circ\text{C}$ . It is hypothesized that the Pd reacted with carbon from the diamond anvils—which had been previously degraded during prior laser-heating sessions—during the mechanical foil preparation as the powder was pressed between the anvils. Supplementary Figure

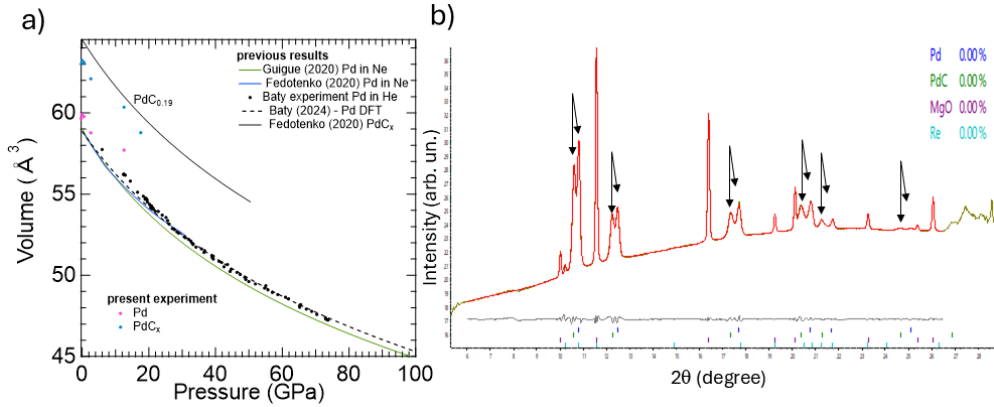

**Supplementary Figure 2 Chemical reaction:** (a) EoS of pure Pd and PdC as reported by previous studies [2–4], compared with data PdC data obtained in the present experiment. (b) Pawley refinement showing the presence of the Pd peak splitting due to the formation of PdC<sub>x</sub>.

3 presents the Pawley refinements of a diffraction pattern collected *in situ* at 72 GPa and 4478 K, where palladium remains exclusively in the  $fcc$  phase. This is compared to XRD data acquired immediately following a thermal quench. Upon quenching, the appearance of new diffraction peaks is observed; these features are well-indexed by a  $bcc$  phase with a molar volume nearly identical to that of the  $fcc$  phase. The calculated volume difference is approximately 0.4%, suggesting a volume-conservative  $fcc \rightarrow bcc$  phase transition, consistent with previous theoretical predictions [3, 5, 6].

## Theoretical simulations

The theoretical investigation of the thermal EoS for palladium was conducted using the Vienna Ab initio Simulation Package (VASP). The electronic structure was modeled using a  $[^{30}\text{Zn}] 4p^6 4d^{10}$  core-valence configuration, assigning 16 outermost electrons to

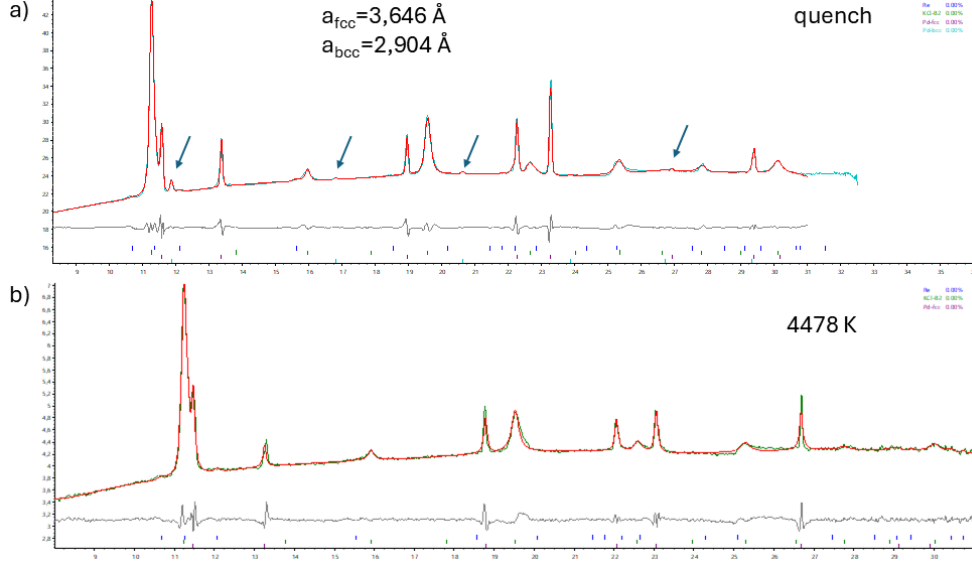

**Supplementary Figure 3 New solid phase:** Pawley refinements of XRD patterns collected at approximately 72 GPa. The pattern obtained at 4478 K (b) exhibits a pure *fcc* phase, while the subsequent thermal quench (a) reveals the emergence of new diffraction peaks. These features are well-indexed by a *bcc*-Pd structure that maintains a molar volume nearly identical to the parent *fcc* phase, consistent with a volume-conservative phase transition.

the valence shell. Valence electrons were expanded in a plane-wave basis set with a kinetic energy cutoff of 350 eV, while core-electron interactions were described by the projector augmented-wave (PAW) method. Various exchange-correlation functionals (XCF) within the density functional theory (DFT) framework—including local density (LDA) and generalized gradient approximations (GGA) such as PBE, PBEsol, and AM05—were evaluated. Previous studies [7–9] established that PBEsol and AM05 provide superior accuracy for Pd, particularly regarding the ambient lattice constant and isothermal bulk modulus. Consequently, we calculated the thermal EOS of *fcc*-Pd using a broad suite of functionals, including LDA, PBE, PBEsol, AM05, PW91, revPBE, and RPBE. The thermal EOS is formulated as a function of density ( $\rho$ ) and temperature ( $T$ ):

$$P(\rho, T) = P(\rho, 0) + CT + DT^2$$

where  $P(\rho, 0)$  represents the cold curve ( $T = 0 \text{ K}$ ), and  $C$  and  $D$  are material-specific constants. Typically,  $C = \alpha B_T$ , where  $\alpha$  is the thermal expansion coefficient and  $K_T$  is the isothermal bulk modulus; their product is assumed to be temperature-independent, while  $D$  accounts for higher-order thermal corrections. The cold curve  $P(\rho, 0)$  was modeled using a third-order Birch-Murnaghan EoS:

$$P(\rho, 0) = \frac{3}{2} K_0 \left( \eta^{7/3} - \eta^{5/3} \right) \left[ 1 + \frac{3}{4} (K'_0 - 4) \left( \eta^{2/3} - 1 \right) \right]$$

Here,  $\eta = \rho/\rho_0$ , and the subscript 0 denotes properties at  $T = 0$  K and  $P = 0$  GPa. For *fcc*-Pd using the AM05 functional, the resulting parameters are  $\rho_0 = 12.175$  g/cm<sup>3</sup>,  $K_0 = 197.3$  GPa, and  $K'_0 = 5.3$ . These values align closely with previous PBEsol results [3] ( $\rho_0 = 12.09$ ,  $K_0 = 195.9 \pm 2.5$  GPa,  $K'_0 = 5.1 \pm 0.1$ ) and are consistent with reported experimental values ( $K_0 = 192 \pm 8$  GPa and  $K'_0 = 4.7 \pm 4$ ). Notably, the calculated  $\rho_0$  and  $K_0$  deviate from experimental benchmarks by less than 0.7% and 1%, respectively [7, 9].

Finite-temperature simulations were performed *via* quantum molecular dynamics (QMD) using the Nosé thermostat algorithm. Calculations used a 32-atom ( $2 \times 2 \times 2$ ) supercell with a dense  $15 \times 15 \times 15$  *k*-point mesh. Rigorous convergence tests were conducted to ensure the stability of the results with respect to mesh density and energy cutoffs. For each XCF implementation, 60 QMD runs were executed at fixed temperatures ranging from 500 K to 5000 K (in 500 K increments) across six distinct lattice constants, corresponding to a pressure range of 0–250 GPa. Each simulation consisted of 15,000 time steps with a 1 fs duration, totaling 15 ps per trajectory to ensure adequate equilibration and statistical sampling.

Direct comparison with experimental data reveals that the AM05 functional provides the most accurate description of the thermal EoS for Pd over the entire 0–250 GPa range. The PBEsol functional yields results nearly identical to AM05 and is considered equally reliable for this system. Detailed numerical results for the AM05-based thermal EoS, including cold curve values and finite-temperature data, are provided in Supplementary Table 1.

| T    | a    | P      | a    | P     | a    | P     | a    | P     | a    | P     | a    | P     |
|------|------|--------|------|-------|------|-------|------|-------|------|-------|------|-------|
| 0    | 4.00 | -15.05 | 3.85 | 3.466 | 3.70 | 39.70 | 3.55 | 104.9 | 3.45 | 174.6 | 3.40 | 221.3 |
| 500  | 4.00 | -14.73 | 3.85 | 5.070 | 3.70 | 41.70 | 3.55 | 106.1 | 3.45 | 177.5 | 3.40 | 222.4 |
| 1000 | 4.00 | -12.58 | 3.85 | 7.137 | 3.70 | 43.81 | 3.55 | 107.8 | 3.45 | 179.9 | 3.40 | 223.9 |
| 1500 | 4.00 | -9.247 | 3.85 | 9.506 | 3.70 | 45.97 | 3.55 | 110.0 | 3.45 | 182.0 | 3.40 | 225.8 |
| 2000 | 4.00 | -5.389 | 3.85 | 12.02 | 3.70 | 48.14 | 3.55 | 112.5 | 3.45 | 183.7 | 3.40 | 228.1 |
| 2500 | 4.00 | -1.650 | 3.85 | 14.52 | 3.70 | 50.25 | 3.55 | 115.1 | 3.45 | 185.0 | 3.40 | 230.7 |
| 3000 | 4.10 | -8.553 | 3.95 | 2.093 | 3.80 | 24.73 | 3.65 | 66.50 | 3.50 | 150.1 | 3.40 | 233.6 |
| 3500 | 4.10 | -6.511 | 3.95 | 5.436 | 3.80 | 27.53 | 3.65 | 73.71 | 3.50 | 153.0 | 3.40 | 237.1 |
| 4000 | 4.15 | -7.657 | 4.00 | 2.368 | 3.85 | 20.35 | 3.70 | 55.68 | 3.55 | 122.1 | 3.40 | 239.7 |
| 4500 | 4.15 | -5.109 | 4.00 | 4.196 | 3.85 | 23.40 | 3.70 | 58.28 | 3.55 | 123.6 | 3.40 | 241.9 |
| 5000 | 4.20 | -2.432 | 4.00 | 9.194 | 3.80 | 36.54 | 3.60 | 101.2 | 3.50 | 160.6 | 3.40 | 244.4 |

**Supplementary Table 1 Theoretical results:**The 66 *ab initio* data points for the thermal EoS of *fcc*-Pd obtained using the AM05 implementation of GGA. Temperature, lattice parameter and pressure are expressed in K, Å and GPa, respectively.

Alternative DFT implementations consistently yield *P* values higher than those derived from AM05, resulting in greater deviations from experimental benchmarks. For example, at a lattice constant of  $a = 3.2$  Å, the calculated cold pressures are 510.7 GPa (AM05), 519.3 GPa (PBEsol), and 542.8 GPa (PBE). These relative differences persist at finite temperatures. Among the available LDA functionals, the LDA-CA (or -PZ) implementation—using the Pd\_pv\_ pseudopotential in VASP—demonstrates the highest performance. In the high-density regime, LDA-CA yields pressure values

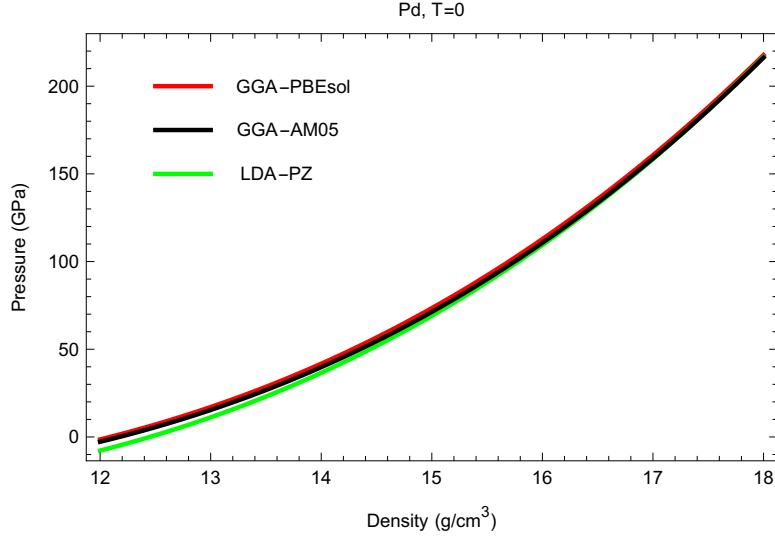

**Supplementary Figure 4** Comparison of cold EoS produced by three different implementations of DFT: PBEsol and AM05 for GGA, and LDA-CA for LDA.

that converge closely with experimental data; for instance, at the aforementioned lattice constant, it predicts 508.4 GPa, a value virtually indistinguishable from the AM05 result. However, LDA-CA exhibits limitations at lower pressures, where it overestimates densities (underestimates volumes) compared to GGA functionals. This leads to lower pressure values than either PBEsol or AM05 at identical  $\rho$  and  $T$ . Specifically, at the AM05 equilibrium density ( $\rho_0 = 12.175 \text{ g/cm}^3$ ,  $a = 3.872 \text{ \AA}$ ), where  $P = 0 \text{ GPa}$ , LDA-CA predicts a pressure of  $-4.7 \text{ GPa}$ . As pressure increases, the thermal EoS produced by LDA-CA approaches that of AM05. Above approximately 100 GPa, the pressures calculated by AM05, PBEsol, and LDA-CA become nearly identical, as demonstrated by the direct comparison in Supplementary Figure 4. The best fit of the thermal EOS model described by Eqs. (1) and (2) to the 60 finite-temperature data points yields the coefficients  $C = 5.6 \times 10^{-3} \text{ GPa/K}$  and  $D = -2.0 \times 10^{-7} \text{ GPa/K}^2$ . This model reproduces the calculated pressures within a margin of 1–2 GPa. Neglecting the second-order term ( $D$ ) results in  $C = 4.8 \times 10^{-3} \text{ GPa/K}$ , which maintains an accuracy of 2–3 GPa. This simplified coefficient is consistent with the experimental product of the ambient thermal expansion coefficient ( $\alpha_0$ ) and the isothermal bulk modulus, which is  $3.5(2) \times 10^{-3} \text{ GPa/K}$ . The 27% discrepancy likely arises from the assumption of a temperature-independent  $\alpha K_T$  product when fitting QMD results across the extensive 0–5000 K range. The reliability of the derived thermal EoS was further validated by calculating the density of *fcc*-Pd at the ambient melting point ( $T_m = 1828 \text{ K}$ ). Solving  $P(\rho, 1828) = 0$  yields a density of  $\rho = 11.509 \text{ g/cm}^3$ , which is within 3% of the experimental value of  $11.179 \text{ g/cm}^3$  [?]. The stability and temporal evolution of temperature and pressure during the QMD simulations are illustrated in Supplementary Figures 5 and 6. These figures represent a specific run at  $a = 3.4 \text{ \AA}$  with a target temperature of 3500 K, which resulted in an equilibrium pressure of

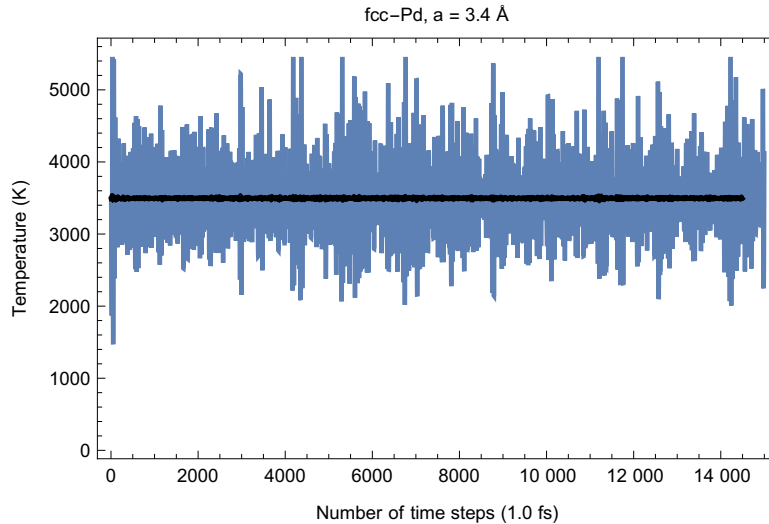

**Supplementary Figure 5** The time evolution of  $T$  in a QMD run of  $fcc$ -Pd with a unit cell of  $3.4 \text{ \AA}$  and with average  $T$  fixed at  $3500 \text{ K}$  using the AM05 implementation of DFT. Shown as a black line is the running average.

$237.1 \text{ GPa}$ . The use of the Nosé algorithm ensures controlled oscillations around the target equilibrium values, as evidenced by the running averages.

In conclusion, while LDA-CA performs exceptionally well at high compression, the GGA functionals (AM05 and PBEsol) offer a more consistent treatment across the entire pressure range, particularly near ambient conditions. The excellent agreement between the derived model and experimental density at the melting point confirms the robustness of the computational approach for modeling Pd under extreme thermodynamic conditions.

## Experimental data

All the information obtained from the data collected from the solid ( $fcc$ ) Pd during the LH-DAC experiments are reported in Supplementary Tables 2, 3 and 4. In particular, we are reporting the extracted lattice parameters of Pd and the used PTM (KCl), the  $T$  measured from spectral-radiometry from both sides of the sample and the corresponding thermal  $P$  measured from the thermal EoS of Dewaele *et al.*[10]

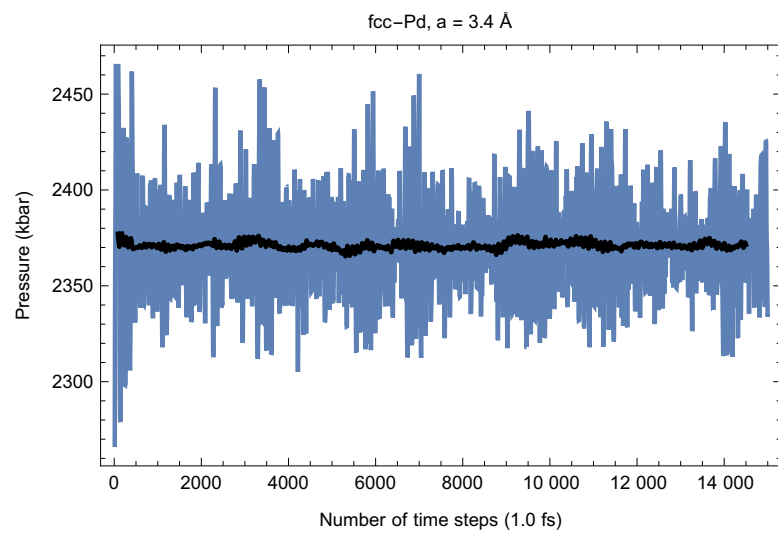

**Supplementary Figure 6** The same as in Supplementary Fig. 5 for the time evolution of  $P$ .

| Run     | aKCl (Å)  | aPd (Å)   | P (GPa)   | TUS (K)   | TDS (K)   | phase  |
|---------|-----------|-----------|-----------|-----------|-----------|--------|
| J5      | 3.242     | 3.751     | 29.6(1)   | 300       | 300       | solid  |
|         | 3.242     | 3.756     | 32(2)     | 1570(210) | 1769(234) | solid  |
|         | 3.243     | 3.758     | 32(2)     | 1554(249) | 1756(215) | solid  |
|         | 3.245     | 3.765     | 32(2)     | 1592(185) | 1756(223) | solid  |
|         | 3.245     | 3.765     | 33(2)     | 1616(244) | 2210(356) | solid  |
|         | 3.245     | 3.766     | 33(2)     | 1754(301) | 2420(313) | solid  |
|         | 3.245     | 3.768     | 34(3)     | 1760(291) | 2535(265) | solid  |
|         | 3.244     | 3.773     | 34(3)     | 1805(345) | 2526(238) | solid  |
|         | 3.245     | 3.775     | 34(2)     | 1759(229) | 2475(181) | solid  |
|         | 3.248     | 3.774     | 34(3)     | 1866(219) | 2886(221) | solid  |
|         | 3.246     | 3.768     | 34(3)     | 1865(203) | 2564(225) | solid  |
|         | 3.246     | 3.766     | 35(3)     | 2115(253) | 3267(457) | solid  |
|         | 3.246     | 3.781     | 35(3)     | 1980(229) | 2943(372) | solid  |
|         | 3.247     | 3.777     | 34(3)     | 1973(213) | 2628(300) | solid  |
|         | 3.245     | 3.775     | 36(4)     | 2247(258) | 3551(591) | liquid |
|         | 3.246     | 3.770     | 39(5)     | 3063(271) | 4718(757) | liquid |
| 3.248   | 3.783     | 38(5)     | 2856(222) | 4413(715) | liquid    |        |
| S-g2-4  | 3.152     | 3.713     | 47(2)     | 1646(201) | 1934(238) | solid  |
|         | 3.152     | 3.710     | 47(2)     | 1620(210) | 1961(252) | solid  |
|         | 3.152     | 3.716     | 47(2)     | 1642(236) | 2227(325) | solid  |
|         | 3.152     | 3.717     | 47(2)     | 1650(243) | 2332(340) | solid  |
|         | 3.152     | 3.713     | 48(3)     | 1692(269) | 2489(455) | solid  |
|         | 3.152     | 3.713     | 48(3)     | 1703(298) | 2577(350) | solid  |
|         | 3.152     | 3.717     | 49(3)     | 1791(138) | 2940(361) | solid  |
|         | 3.154     | 3.715     | 48(3)     | 1777(140) | 2883(353) | solid  |
|         | 3.153     | 3.715     | 49(3)     | 1794(105) | 3047(292) | solid  |
|         | 3.153     | 3.717     | 49(3)     | 1804(123) | 3158(434) | solid  |
|         | 3.153     | 3.717     | 50(3)     | 1976(85)  | 3370(310) | solid  |
|         | 3.153     | 3.722     | 50(4)     | 1939(78)  | 3445(379) | solid  |
|         | 3.153     | 3.721     | 50(4)     | 2097(126) | 3585(185) | solid  |
|         | 3.153     | 3.723     | 50(4)     | 2101(82)  | 3636(169) | solid  |
|         | 3.153     | 3.721     | 51(4)     | 2154(114) | 3905(144) | solid  |
|         | 3.154     | 3.717     | 51(4)     | 2166(103) | 4064(192) | liquid |
| J1-g2-2 | 3.126622  | 3.6827919 | 48.1(1)   | 300       | 300       | solid  |
|         | 3.128526  | 3.6873679 | 51(2)     | 1765(328) | 2117(562) | solid  |
|         | 3.1275699 | 3.6914849 | 51(2)     | 1433(273) | 1734(444) | solid  |
|         | 3.1249051 | 3.6920099 | 51(2)     | 1389(297) | 1763(614) | solid  |
|         | 3.1248529 | 3.7025881 | 51(2)     | 1427(416) | 1798(848) | solid  |
|         | 3.1248181 | 3.6947501 | 52(2)     | 1648(257) | 2148(337) | solid  |
|         | 3.1250861 | 3.6980901 | 52(2)     | 1748(302) | 2332(337) | solid  |
|         | 3.1253569 | 3.699126  | 53(3)     | 1813(302) | 2593(363) | solid  |
|         | 3.1253779 | 3.7065239 | 53(3)     | 1973(275) | 2791(391) | solid  |
|         | 3.1253221 | 3.712868  | 54(3)     | 2011(283) | 3017(315) | solid  |
|         | 3.1253309 | 3.713542  | 54(3)     | 2126(287) | 3099(285) | solid  |
|         | 3.125859  | 3.7090061 | 55(4)     | 2257(305) | 3454(348) | solid  |
|         | 3.1254959 | 3.708571  | 55(4)     | 2305(289) | 3550(326) | solid  |
|         | 3.125772  | 3.70451   | 55(4)     | 2350(306) | 3732(363) | solid  |
|         | 3.1261001 | 3.7064021 | 55(4)     | 2370(336) | 3760(312) | solid  |
|         | 3.1261971 | 3.707283  | 56(4)     | 2516(353) | 3988(352) | liquid |

**Supplementary Table 2 Experimental results:** Table containing all the quantities measured during the LH-DAC experiment. In particular, aKCl and aPd represent the lattice parameters of KCl and Pd, respectively.  $P$  is the pressure determined from the thermal EoS of Dewaele *et al.* [10] for KCl. TUS and TDS represent the  $T$  measured by spectral-radiometry from the up-stream (US) and the downstream (DS) side of the sample, respectively. The error in the determined  $P$  and  $T$  is represented in the parenthesis of each measurement, while for the lattice parameters we have evaluated an error of the order of 0.002 Å that agrees with the typical resolution associated with synchrotron XRD measurements.

| Run     | aKCl (Å) | aPd (Å) | P (GPa)   | TUS (K)   | TDS (K)   | phase  |
|---------|----------|---------|-----------|-----------|-----------|--------|
| J1-g2-3 | 3.100    | 3.669   | 53.5(1)   | 300       | 300       | solid  |
|         | 3.102    | 3.686   | 57(2)     | 1724(281) | 2118(276) | solid  |
|         | 3.096    | 3.670   | 61(4)     | 2148(117) | 3619(426) | solid  |
|         | 3.103    | 3.689   | 61(4)     | 2348(173) | 4069(477) | solid  |
|         | 3.104    | 3.690   | 61(4)     | 2443(251) | 4150(518) | solid  |
|         | 3.104    | 3.692   | 61(5)     | 2729(103) | 4427(475) | solid  |
|         | 3.105    | 3.700   | 61(5)     | 2791(104) | 4446(479) | solid  |
|         | 3.106    | 3.702   | 62(5)     | 2902(106) | 4847(585) | liquid |
|         | 3.106    | 3.702   | 62(5)     | 2870(102) | 4748(535) | liquid |
| S2-1    | 3.043    | 3.638   | 71(2)     | 1742(408) | 2125(252) | solid  |
|         | 3.043    | 3.639   | 71(2)     | 1726(264) | 2105(356) | solid  |
|         | 3.043    | 3.639   | 71(2)     | 1746(246) | 2128(308) | solid  |
|         | 3.044    | 3.640   | 71(2)     | 1803(237) | 2131(291) | solid  |
|         | 3.044    | 3.641   | 71(2)     | 1680(250) | 2109(272) | solid  |
|         | 3.043    | 3.638   | 71(2)     | 1752(266) | 2142(297) | solid  |
|         | 3.045    | 3.643   | 70(2)     | 1527(194) | 2031(286) | solid  |
|         | 3.044    | 3.641   | 70(2)     | 1489(160) | 2000(278) | solid  |
|         | 3.045    | 3.642   | 70(2)     | 1492(181) | 2018(308) | solid  |
|         | 3.045    | 3.645   | 71(2)     | 1933(241) | 2440(286) | solid  |
|         | 3.045    | 3.647   | 72(3)     | 2048(258) | 2667(395) | solid  |
|         | 3.046    | 3.650   | 72(3)     | 2100(256) | 2782(461) | solid  |
|         | 3.045    | 3.650   | 72(3)     | 2152(277) | 2817(433) | solid  |
|         | 3.046    | 3.652   | 71(2)     | 2365(307) | 2312(600) | solid  |
|         | 3.046    | 3.654   | 73(3)     | 2401(311) | 3253(824) | solid  |
|         | 3.046    | 3.653   | 74(4)     | 2591(449) | 3729(718) | solid  |
| 3.046   | 3.672    | 78(6)   | 2508(306) | 5652(355) | liquid    |        |
| 3.050   | 3.672    | 70(3)   | 2349(407) | 2637(670) | solid     |        |
| 3.051   | 3.650    | 70(3)   | 2372(449) | 2619(405) | solid     |        |
| J2-1    | 3.022    | 3.626   | 77(2)     | 1619(341) | 2154(366) | solid  |
|         | 3.022    | 3.627   | 78(3)     | 1742(191) | 2748(413) | solid  |
|         | 3.023    | 3.628   | 79(3)     | 2034(237) | 3357(331) | solid  |
|         | 3.024    | 3.629   | 80(4)     | 2121(249) | 3721(313) | solid  |
|         | 3.025    | 3.629   | 81(5)     | 2306(353) | 4382(394) | solid  |
|         | 3.024    | 3.633   | 81(5)     | 2422(399) | 4573(652) | solid  |
|         | 3.025    | 3.633   | 81(5)     | 2425(313) | 4504(781) | solid  |
|         | 3.025    | 3.635   | 82(5)     | 2564(453) | 5011(484) | solid  |
|         | 3.025    | 3.633   | 83(6)     | 2712(300) | 5458(542) | liquid |
|         | 3.024    | 3.641   | 85(6)     | 2862(300) | 6006(731) | liquid |
| 3.026   | 3.634    | 84(6)   | 3001(500) | 6002(750) | liquid    |        |
| J2-2    | 2.989    | 3.607   | 83.0(1)   | 300       | 300       | solid  |
|         | 2.990    | 3.609   | 86(2)     | 1646(381) | 2126(513) | solid  |
|         | 2.989    | 3.609   | 86(2)     | 1556(294) | 2016(414) | solid  |
|         | 2.989    | 3.609   | 86(2)     | 1516(238) | 1982(407) | solid  |
|         | 2.989    | 3.610   | 86(2)     | 1514(203) | 2079(386) | solid  |

**Supplementary Table 3 Experimental results:** Table containing all the quantities measured during the LH-DAC experiment. In particular, aKCl and aPd represent the lattice parameters of KCl and Pd, respectively.  $P$  is the pressure determined from the thermal EoS of Dewaele *et al.*[10] for KCl. TUS and TDS represent the  $T$  measured by spectral-radiometry from the up-stream (US) and the downstream (DS) side of the sample, respectively. The error in the determined  $P$  and  $T$  is represented in the parenthesis of each measurement, while for the lattice parameters we have evaluated an error of the order of 0.002 Å that agrees with the typical resolution associated with synchrotron XRD measurements.

| Run   | aKCl (Å) | aPd (Å) | P (GPa)   | TUS (K)   | TDS (K)   | phase  |
|-------|----------|---------|-----------|-----------|-----------|--------|
| J2-2  | 2.989    | 3.610   | 87(2)     | 1606(243) | 2229(419) | solid  |
|       | 2.989    | 3.611   | 87(2)     | 1685(259) | 2377(464) | solid  |
|       | 2.989    | 3.611   | 88(3)     | 1795(257) | 2583(445) | solid  |
|       | 2.990    | 3.611   | 88(3)     | 1930(236) | 2780(265) | solid  |
|       | 2.990    | 3.614   | 89(3)     | 2048(285) | 3177(240) | solid  |
|       | 2.990    | 3.612   | 90(4)     | 2149(412) | 3840(239) | solid  |
|       | 2.991    | 3.611   | 91(4)     | 2217(271) | 4134(210) | solid  |
|       | 2.991    | 3.612   | 90(4)     | 2302(375) | 4210(189) | solid  |
|       | 2.993    | 3.614   | 91(5)     | 2393(583) | 4587(200) | solid  |
|       | 2.994    | 3.615   | 91(5)     | 2500(872) | 4759(192) | liquid |
|       | 2.995    | 3.618   | 91(5)     | 2557(476) | 5123(211) | liquid |
|       | 2.994    | 3.614   | 93(6)     | 2698(529) | 5542(342) | liquid |
|       | 2.993    | 3.616   | 93(6)     | 2786(453) | 5727(112) | liquid |
|       | 2.996    | 3.622   | 93(6)     | 2934(336) | 6058(173) | liquid |
| S2-2  | 2.975    | 3.587   | 91(2)     | 1705(230) | 2391(279) | solid  |
|       | 2.974    | 3.587   | 92(2)     | 1761(184) | 2543(170) | solid  |
|       | 2.970    | 3.583   | 89.1(1)   | 300       | 300       | solid  |
|       | 2.971    | 3.588   | 93(2)     | 1790(206) | 2657(197) | solid  |
|       | 2.971    | 3.589   | 93(2)     | 1862(195) | 2900(153) | solid  |
|       | 2.966    | 3.592   | 96(3)     | 2085(214) | 3673(198) | solid  |
|       | 2.962    | 3.594   | 98(3)     | 2279(258) | 4519(259) | solid  |
|       | 2.965    | 3.596   | 98(4)     | 2470(313) | 5273(333) | solid  |
|       | 2.962    | 3.596   | 99(4)     | 2536(286) | 4840(395) | solid  |
|       | 2.962    | 3.596   | 99(4)     | 2589(286) | 4971(423) | solid  |
|       | 2.963    | 3.598   | 99(4)     | 2619(294) | 5218(452) | solid  |
|       | 2.962    | 3.597   | 100(4)    | 2710(315) | 5581(478) | solid  |
|       | 2.960    | 3.599   | 102(5)    | 2792(328) | 5962(521) | liquid |
| S2-3  | 2.953    | 3.584   | 95.1(1)   | 300       | 300       | solid  |
|       | 2.957    | 3.597   | 103(5)    | 3122(240) | 4524(513) | solid  |
|       | 2.956    | 3.597   | 104(5)    | 3372(303) | 5030(571) | solid  |
|       | 2.952    | 3.598   | 106(6)    | 3538(326) | 5373(492) | solid  |
|       | 2.956    | 3.598   | 105(6)    | 3572(314) | 5566(561) | solid  |
|       | 2.958    | 3.600   | 105(6)    | 3650(317) | 5559(681) | liquid |
|       | 2.952    | 3.596   | 106(6)    | 3499(287) | 5287(552) | liquid |
|       | 2.953    | 3.599   | 106(6)    | 3594(303) | 5417(565) | liquid |
| 2.960 | 3.599    | 105(6)  | 3912(335) | 6086(568) | liquid    |        |

**Supplementary Table 4 Experimental results:**Table containing all the quantities measured during the LH-DAC experiment. In particular, aKCl and aPd represent the lattice parameters of KCl and Pd, respectively.  $P$  is the pressure determined from the thermal EoS of Dewaele *et al.*[10] for KCl. TUS and TDS represent the  $T$  measured by spectral-radiometry from the up-stream (US) and the downstream (DS) side of the sample, respectively. The error in the determined  $P$  and  $T$  is represented in the parenthesis of each measurement, while for the lattice parameters we have evaluated an error of the order of 0.002 Å that agrees with the typical resolution associated with synchrotron XRD measurements.

## References

- [1] Anzellini, S. *et al.* Laser-heating system for high-pressure X-ray diffraction at the extreme condition beamline I15 at Diamond Light Source. *Journal of Synchrotron Radiation* **25** (2018).
- [2] Fedotenko, T. *et al.* Synthesis of palladium carbides and palladium hydride in laser heated diamond anvil cells. *Journal of Alloys and Compounds* **844**, 156179 (2020).
- [3] Baty, S. R., Burakovsky, L., Luscher, D., Anzellini, S. & Errandonea, D. Palladium at high pressure and high temperature: a combined experimental and theoretical study. *Journal of Applied Physics* **135**, 075103 (2024).
- [4] Guigue, B., Geneste, G., Leridon, B. & Loubeyre, P. An x-ray study of palladium hydrides up to 100 gpa: Synthesis and isotopic effects. *Journal of Applied Physics* **127**, 075901 (2020).
- [5] Liu, Z.-L., Yang, J.-H., Cai, L.-C., Jing, F.-Q. & Alfé, D. Structural and thermodynamic properties of compressed palladium: Ab initio and molecular dynamics study. *Physical Review B* **83**, 144113 (2011).
- [6] Smirnov, N. Ab initio calculations of structural stability, thermodynamic and elastic properties of Ni, Pd, Rh, and Ir at high pressures. *Journal of Applied Physics* **14**, 025901 (2023).
- [7] Mattsson, A. *et al.* The AM05 density functional applied to solids. *J. Chem. Phys.* **128**, 084714 (2008).
- [8] Ropo, M., Kokko, K. & Vitos, L. Assessing the Perdew-Burke-Ernzerhof exchange-correlation density functional revised for metallic bulk and surface systems. *Physical Review B* **77**, 195445 (2008).
- [9] Liu, H. *et al.* Assessing r2SCAN meta-GGA functional for structural parameters, cohesive energy, mechanical modulus, and thermophysical properties of 3d, 4d, and 5d transition metals. *The Journal of Chemical Physics* **160**, 024102 (2024).
- [10] Dewaele, A. *et al.* High-pressure-high-temperature equation of state of KCl and KBr. *Physical Review B - Condensed Matter and Materials Physics* **85**, 1–7 (2012).
